# Supplementary material for: Stage-Specific Genetic Interaction between FgYCK1 and FgBNI4 during Vegetative Growth and Conidiation in Fusarium graminearum
Source: MDPI journal article supplement (doi:10.3390/ijms23169106), 2022-08-14
Supplement: s1 [file s1]

**Table S2. Mutations in *FgBNI4* and *FgTNA1* identified in spontaneous suppressors of *Fgyck1* mutant by direct sequencing of PCR products.**

| Suppressor strains | <i>FgBNI4</i>               |                    | <i>FgTNA1</i>     |                    |
|--------------------|-----------------------------|--------------------|-------------------|--------------------|
|                    | Nucleotide change           | Amino acid changes | Nucleotide change | Amino acid changes |
| S1                 | nd                          | nd                 | nd                | nd                 |
| S2                 | nd                          | nd                 | nd                | nd                 |
| S3                 | C <sup>1468</sup> GA to TGA | R490*              | nd                | nd                 |
| S4                 | nd                          | nd                 | nd                | nd                 |
| S5                 | nd                          | nd                 | nd                | nd                 |
| S6                 | nd                          | nd                 | nd                | nd                 |
| S7                 | C <sup>2095</sup> GC to TGC | R699C              | nd                | nd                 |
| S9                 | nd                          | nd                 | nd                | nd                 |
| S10                | ΔCT <sup>2051-2052</sup>    | P684fs             | nd                | nd                 |
| S11                | nd                          | nd                 | nd                | nd                 |
| S13                | nd                          | nd                 | nd                | nd                 |
| S14                | nd                          | nd                 | nd                | nd                 |
| S15                | ΔAC <sup>1617-1618</sup>    | R539fs             | nd                | nd                 |
| S16                | nd                          | nd                 | nd                | nd                 |
| S17                | nd                          | nd                 | nd                | nd                 |
| S18                | nd                          | nd                 | nd                | nd                 |
| S19                | nd                          | nd                 | nd                | nd                 |
| S20                | nd                          | nd                 | nd                | nd                 |

\* stop codon; fs, frame shift; nd, not detected; Δ, deletion.
