# Supplementary material for: Stage-Specific Genetic Interaction between FgYCK1 and FgBNI4 during Vegetative Growth and Conidiation in Fusarium graminearum
Source: MDPI journal article supplement (doi:10.3390/ijms23169106), 2022-08-14
Supplement: s1 [file s1]

**Table S1 Phenotypes of the spontaneous suppressor strains.**

| Strain                | Growth rate<br>(mm/day) <sup>a</sup> | Conidiation<br>( $\times 10^4$ conidia/mL) <sup>b</sup> | Conidial length<br>( $\mu\text{m}$ ) <sup>c</sup> | Conidial septation<br>(septa/conidium) <sup>d</sup> |
|-----------------------|--------------------------------------|---------------------------------------------------------|---------------------------------------------------|-----------------------------------------------------|
| PH-1                  | 11.1 $\pm$ 0.4                       | 126.4 $\pm$ 7.2                                         | 46.9 $\pm$ 2.1                                    | 4.2 $\pm$ 0.7                                       |
| FY6 ( <i>Fgyck1</i> ) | 1.6 $\pm$ 0.2                        | 0                                                       | 0                                                 | 0                                                   |
| S1                    | 1.9 $\pm$ 0.1                        | 1.4 $\pm$ 0.6                                           | 24.5 $\pm$ 2.4                                    | 2.6 $\pm$ 0.8                                       |
| S2                    | 4.3 $\pm$ 0.2                        | 1.3 $\pm$ 0.5                                           | 28.4 $\pm$ 4.2                                    | 2.8 $\pm$ 0.6                                       |
| S3                    | 4.4 $\pm$ 0.2                        | 6.3 $\pm$ 2.4                                           | 28.0 $\pm$ 6.3                                    | 2.3 $\pm$ 0.8                                       |
| S4                    | 3.2 $\pm$ 0.1                        | 0                                                       | 0                                                 | 0                                                   |
| S5                    | 4.7 $\pm$ 0.4                        | 0                                                       | 0                                                 | 0                                                   |
| S6                    | 3.7 $\pm$ 0.3                        | 3.6 $\pm$ 1.5                                           | 29.5 $\pm$ 6.5                                    | 2.8 $\pm$ 1.2                                       |
| S7                    | 3.6 $\pm$ 0.2                        | 1.8 $\pm$ 1.1                                           | 28.7 $\pm$ 7.6                                    | 2.7 $\pm$ 0.9                                       |
| S8*                   | 3.2 $\pm$ 0.1                        | 1.5 $\pm$ 0.6                                           | 26.7 $\pm$ 5.1                                    | 2.3 $\pm$ 0.6                                       |
| S9                    | 2.0 $\pm$ 0.1                        | 0                                                       | 0                                                 | 0                                                   |
| S10                   | 3.3 $\pm$ 0.1                        | 3.9 $\pm$ 1.6                                           | 27.2 $\pm$ 3.7                                    | 2.9 $\pm$ 0.3                                       |
| S11                   | 2.9 $\pm$ 0.1                        | 8.6 $\pm$ 3.5                                           | 23.9 $\pm$ 2.1                                    | 2.3 $\pm$ 1.0                                       |
| S12*                  | 4.0 $\pm$ 0.1                        | 22.9 $\pm$ 5.6                                          | 28.2 $\pm$ 4.9                                    | 2.5 $\pm$ 0.9                                       |
| S13                   | 4.4 $\pm$ 0.3                        | 14.4 $\pm$ 8.0                                          | 24.2 $\pm$ 1.1                                    | 2.7 $\pm$ 0.9                                       |
| S14                   | 3.4 $\pm$ 0.2                        | 4.6 $\pm$ 2.2                                           | 27.2 $\pm$ 3.4                                    | 2.6 $\pm$ 0.5                                       |
| S15                   | 4.6 $\pm$ 0.1                        | 2.67 $\pm$ 1.3                                          | 24.9 $\pm$ 2.3                                    | 2.5 $\pm$ 0.6                                       |
| S16                   | 2.5 $\pm$ 0.1                        | 0                                                       | 0                                                 | 0                                                   |
| S17                   | 4.2 $\pm$ 0.1                        | 0                                                       | 0                                                 | 0                                                   |
| S18                   | 3.1 $\pm$ 0.2                        | 0                                                       | 0                                                 | 0                                                   |
| S19                   | 4.2 $\pm$ 0.5                        | 0                                                       | 0                                                 | 0                                                   |
| S20                   | 2.8 $\pm$ 0.1                        | 0                                                       | 0                                                 | 0                                                   |
| S21*                  | 3.7 $\pm$ 0.2                        | 2.1 $\pm$ 0.9                                           | 24.7 $\pm$ 2.5                                    | 2.3 $\pm$ 0.8                                       |
| S22*                  | 2.4 $\pm$ 0.1                        | 0                                                       | 0                                                 | 0                                                   |
| S23*                  | 4.5 $\pm$ 0.1                        | 8.5 $\pm$ 2.9                                           | 29.4 $\pm$ 4.2                                    | 2.7 $\pm$ 1.0                                       |
| S24*                  | 4.6 $\pm$ 0.1                        | 9.9 $\pm$ 3.0                                           | 20.9 $\pm$ 1.4                                    | 2.0 $\pm$ 0.7                                       |
| S25*                  | 3.9 $\pm$ 0.1                        | 0                                                       | 0                                                 | 0                                                   |

\* indicates suppressor strains selected for genome sequencing.

<sup>a</sup> average radial growth per day on PDA plates.

<sup>b</sup> conidiation in 5-day-old CMC cultures.

<sup>c</sup>, <sup>d</sup> more than 30 conidia cells were examined.

Mean and standard deviation were calculated from three biological replicates.
