# Supplementary material for: Stage-Specific Genetic Interaction between FgYCK1 and FgBNI4 during Vegetative Growth and Conidiation in Fusarium graminearum
Source: MDPI journal article supplement (doi:10.3390/ijms23169106), 2022-08-14
Supplement: s1 [file s1]

**Table S4. Primers used in this study.**

| <b>Name</b> | <b>Sequence (5'-3')</b>                                         | <b>Application</b>                                               |
|-------------|-----------------------------------------------------------------|------------------------------------------------------------------|
| B1F         | TCGCTGTTCTCCTGTGTCC                                             | <i>FgBNI4</i> deletion                                           |
| B2R         | TTGACCTCCACTAGCTCCAGCCAAGCCAAGTCCCCGATACTGGTGG                  | <i>FgBNI4</i> deletion                                           |
| B3F         | GAATAGAGTAGATGCCGACCGCGGGTTGCGACATTCTCTCCTCGCAT                 | <i>FgBNI4</i> deletion                                           |
| B4R         | GCAGCTTTCCCCAGATGAGT                                            | <i>FgBNI4</i> deletion                                           |
| B5F         | AATCAACATGGCCGCTCTCA                                            | <i>FgBNI4</i> deletion                                           |
| B6R         | CATCGTAGGCCTCGTCAGTC                                            | <i>FgBNI4</i> deletion                                           |
| B7F         | TCCCTGGGCCGATAACCTTA                                            | <i>FgBNI4</i> deletion                                           |
| B8R         | GACGTCATTGTGACATGCG                                             | <i>FgBNI4</i> deletion                                           |
| HT/F        | GATGTAGGAGGGCGTGGATATGTCCT                                      | <i>FgBNI4</i> deletion                                           |
| HY/R        | GTATTGACCGATTCTTGCGGTCCGAA                                      | <i>FgBNI4</i> deletion                                           |
| YG/F        | GGCTTGGCTGGAGCTAGTGGAGGTCAA                                     | <i>FgBNI4</i> deletion                                           |
| HT/R        | AACCCGCGGTCGGCATCTACTCTATTC                                     | <i>FgBNI4</i> deletion                                           |
| H852        | AACTACCGCGACGTCTGTC                                             | <i>FgBNI4</i> deletion                                           |
| H850        | TTGTCCGTCAGGACATTGTT                                            | <i>FgBNI4</i> deletion                                           |
| H855R       | GCTGATCTGACCAGTTGC                                              | <i>FgBNI4</i> deletion                                           |
| H866F       | GTCGATGCGACGCAATCGT                                             | <i>FgBNI4</i> deletion                                           |
| FgBNI4/CF   | AGGGAACAAAAGCTGGGTACCCCTTGTCCTGCATGCTTA                         | generation of complementation construct for <i>Fgbni4</i> mutant |
| FgBNI4/CR   | GAACAGCTCCTCGCCCTTGCTCACGCAGCTTTCCCCAGATGAGT                    | generation of complementation construct for <i>Fgbni4</i> mutant |
| Y1F         | GCTGTTCCCTAGCAGTCCAG                                            | <i>FgYCK1</i> deletion                                           |
| Y2R         | CAGATACGGCAGAGAAATCGCAACCTCACGGTAGTGAACGCCTACG<br>A             | <i>FgYCK1</i> deletion                                           |
| Y3F         | GTTTAGATTCCAAGTGTCTACTGCTGGCGCCAGCTAACCCTCAGCCTA                | <i>FgYCK1</i> deletion                                           |
| Y4R         | CGCATCTTCGATCATTCTCATCAA                                        | <i>FgYCK1</i> deletion                                           |
| Y5F         | CAATCTACTCAACAACCAGCAAGTT                                       | <i>FgYCK1</i> deletion                                           |
| Y6R         | CCTTTCCCGAATCCTTAGAGATCTT                                       | <i>FgYCK1</i> deletion                                           |
| Y7F         | CGTACAGTACGCAACTAGAAAAGTG                                       | <i>FgYCK1</i> deletion                                           |
| Y8R         | TGAGACCAACCAGATTGAGAGC                                          | <i>FgYCK1</i> deletion                                           |
| GEN/F       | GAGGTTGCGATTTCTCTGCCGTATCTG                                     | <i>FgYCK1</i> deletion                                           |
| GEN/R       | GCCAGCAGTAGACACTTGGAATCTAAAC                                    | <i>FgYCK1</i> deletion                                           |
| G850        | TCGGCTATGACTGGGCACAACA                                          | <i>FgYCK1</i> deletion                                           |
| G852        | GAGCGGCGATACCGTAAAGCAC                                          | <i>FgYCK1</i> deletion                                           |
| G855/R      | TGTTGGGTTTGAGCTAGGTGGG                                          | <i>FgYCK1</i> deletion                                           |
| G866/F      | GAATGGTCAAATCAAAGTCTAGATAT                                      | <i>FgYCK1</i> deletion                                           |
| FgYCK1/CF   | CGACTCACTATAGGGCGAATTGGGTACTCAAATTGGCGACAAGAACC<br>TTGAATCTCAAC | generation of complementation construct for <i>Fgyck1</i> mutant |

|            |                                                             |                                                                     |
|------------|-------------------------------------------------------------|---------------------------------------------------------------------|
| FgYCK1/CR  | CTTTATAATCACCGTCATGGTCTTTGTAGTCTCGATCATTCTTCATCAA<br>GCAGA  | generation of complementation construct<br>for <i>Fgyck1</i> mutant |
| P1F        | GGCCGATCATTGTGGAATCTTC                                      | generation of <i>FgBNI4</i> <sup>R699C</sup> transformants          |
| P1R        | GCAGTCGTA CTCTGGCTAG                                        | generation of <i>FgBNI4</i> <sup>R699C</sup> transformants          |
| P2F        | CTAGCCAGGAGTACGACTGC                                        | generation of <i>FgBNI4</i> <sup>R699C</sup> transformants          |
| P2R        | CAGATACGGCAGAGAAATCGCAACCTCTCTGTAAATCACTTTCAACG<br>GCAT     | generation of <i>FgBNI4</i> <sup>R699C</sup> transformants          |
| P3F        | GTTTAGATTCCAAGTGTCTACTGCTGGCTCTGGTGTCTGATCCATACT<br>TGATA   | generation of <i>FgBNI4</i> <sup>R699C</sup> transformants          |
| P3R        | CTCCTTCATCCATTCTGTATCGTCT                                   | generation of <i>FgBNI4</i> <sup>R699C</sup> transformants          |
| S1F        | AGGGCGCAAGCTAAGAGC                                          | generation of <i>FgBNI4</i> <sup>ΔCT</sup> transformants            |
| S1R        | TGCGCAAGCAGAGGAGTCAATCGATTGCACGT                            | generation of <i>FgBNI4</i> <sup>ΔCT</sup> transformants            |
| S2F        | CGATTGACTCCTCTGCTTGCGCAACAGATCAAGG                          | generation of <i>FgBNI4</i> <sup>ΔCT</sup> transformants            |
| S2R        | TTGACCTCCACTAGTCCAGCCAAGCCCGTTCCAGTTTCAACGGTG<br>A          | generation of <i>FgBNI4</i> <sup>ΔCT</sup> transformants            |
| S3F        | CGTCCGCAATGTGTTATTAAGTCGACCTCAATGGAGCGGACATAACG             | generation of <i>FgBNI4</i> <sup>ΔCT</sup> transformants            |
| S3R        | TTCTGGTAAGCATGCGCCAGG                                       | generation of <i>FgBNI4</i> <sup>ΔCT</sup> transformants            |
| GFP/1F     | GTAGGAACCCAATCTTCAAACCTCGAGATGGTGAGCAAGGGCGAGGA             | generation of GFP- <i>FgRHO1</i> construct<br>with RP27 promoter    |
| GFP/2R     | TCCTCCTCCTCCTCCTCCTCCTCCTCCTTGTACAGCTCGTCCATG<br>CCGA       | generation of GFP- <i>FgRHO1</i> construct<br>with RP27 promoter    |
| GFP-RHO1/F | GGAGGAGGAGGAGGAGGAGGAGGAGGAGGAGGATCC<br>ATGGCTGAGATCCGCCGAA | generation of GFP- <i>FgRHO1</i> construct<br>with RP27 promoter    |
| GFP-RHO1/R | TGATTTCAGTAACGTAAAGTGGATCCAAACGAAAAGATTTATGGCCTG<br>ACC     | generation of GFP- <i>FgRHO1</i> construct<br>with RP27 promoter    |
| FgSPA2/F   | AGGGAACAAAAGCTGGGTACCCCCATAAACTTGAGGCCTCT                   | generation of GFP- <i>FgSPA2</i> construct                          |
| FgSPA2/R   | GAACAGCTCCTCGCCCTTGCTCACCGAAAAAGTCATCAGGTCGTCCG             | generation of GFP- <i>FgSPA2</i> construct                          |
| FgBNI4/TF  | AACAATTAACAAAAGCGACTCTCGT                                   | DNA sequencing of <i>FgBNI4</i> gene                                |
| FgBNI4/TR  | GAGACTGGTTAGAGTAATTGAACGC                                   | DNA sequencing of <i>FgBNI4</i> gene                                |
| FgTNA1/TF  | ATAATACCCAGCGATGTCTTGTGTA                                   | DNA sequencing of <i>FgTNA1</i> gene                                |
| FgTNA1/TR  | CTCGTGAGGTGTGGAGTTATGATAT                                   | DNA sequencing of <i>FgTNA1</i> gene                                |
