# Supplementary material for: Stage-Specific Genetic Interaction between FgYCK1 and FgBNI4 during Vegetative Growth and Conidiation in Fusarium graminearum
Source: MDPI journal article supplement (doi:10.3390/ijms23169106), 2022-08-14
Supplement: s1 [file s1]

**Table S3 Phenotypes of the *Fgbni4* mutant in growth, conidiation and plant infection.**

| Strain                        | Growth rate<br>(mm/day) <sup>a</sup> | Conidiation ( $\times 10^4$<br>conidia/mL) <sup>b</sup> | Disease index <sup>c</sup> |
|-------------------------------|--------------------------------------|---------------------------------------------------------|----------------------------|
| PH-1 (WT)                     | 10.9 $\pm$ 0.3 <sup>A*</sup>         | 101.7 $\pm$ 13.0 <sup>A</sup>                           | 8.9 $\pm$ 1.3 <sup>A</sup> |
| FB5 ( <i>Fgbni4</i> )         | 10.4 $\pm$ 0.4 <sup>A</sup>          | 108.3 $\pm$ 19.2 <sup>A</sup>                           | 7.7 $\pm$ 1.5 <sup>A</sup> |
| FBC9 ( <i>Fgbni4/FgBNI4</i> ) | 11.0 $\pm$ 0.2 <sup>A</sup>          | 99.0 $\pm$ 13.8 <sup>A</sup>                            | 9.4 $\pm$ 1.7 <sup>A</sup> |

<sup>a</sup> Average radial growth per day on PDA plates.

<sup>b</sup> Conidiation in 5-day-old CMC cultures.

<sup>c</sup> Diseased spikelets per wheat head at 14 dpi.

\* Mean and standard deviation were calculated from three independent replicates. Different letters indicate significant differences by Duncan's multiple range test (p=0.05).
