# Supplementary material for: Stage-Specific Genetic Interaction between FgYCK1 and FgBNI4 during Vegetative Growth and Conidiation in Fusarium graminearum
Source: Int J Mol Sci. 2022 Aug 14;23(16):9106. doi: 10.3390/ijms23169106 (PMC9408904; doi:10.3390/ijms23169106)
Supplement: Supplementary file 1 [file ijms-23-09106-s001.zip]

Archive with 11 entries (11 files):
- Figure S1.pdf
- Figure S2.tif
- Figure S3.pdf
- Figure S4.tif
- Figure S5.tif
- Figure S6.tif
- Figure S7.tif
- Table S1.pdf
- Table S2.pdf
- Table S3.pdf
- Table S4.pdf
