# Supplementary material for: Stage-Specific Genetic Interaction between FgYCK1 and FgBNI4 during Vegetative Growth and Conidiation in Fusarium graminearum
Source: Int J Mol Sci. 2022 Aug 14;23(16):9106. doi: 10.3390/ijms23169106 (PMC9408904; doi:10.3390/ijms23169106)
Supplement: Supplementary file 1 [file ijms-23-09106-s001.zip › Figure S1.pdf]

```

      *      20      *      40      *      60      *      80      *      100      *      120      *      140
FgYck1 : -----SSNVVGVIHYRVGKKIGEGSFGVIFEGTNLLNNQQAIAKFEPKRSAPQLRDEYRTYKILVGCPIPNVYVFGQ : 77
FoYck1 : -----SSNVVGVIHYRVGKKIGEGSFGVIFEGTNLLNNQQAIAKFEPKRSAPQLRDEYRTYKILVGCPIPNVYVFGQ : 77
MoYck1 : -----SSNVVGVIHYRVGKKIGEGSFGVIFEGTNLLNNQQAIAKFEPKRSAPQLRDEYRTYKILVGCPIPNVYVFGQ : 77
NeYck1 : -----SSNVVGVIHYRVGKKIGEGSFGVIFEGTNLLNNQQAIAKFEPKRSAPQLRDEYRTYKILVGCPIPNVYVFGQ : 78
BeYck1 : -----SSNVVGVIHYRVGKKIGEGSFGVIFEGTNLLNNQQAIAKFEPKRSAPQLRDEYRTYKILVGCPIPNVYVFGQ : 77
AnYck1 : -----SSNVVGVIHYRVGKKIGEGSFGVIFEGTNLLNNQQAIAKFEPKRSAPQLRDEYRTYKILVGCPIPNVYVFGQ : 77
UmYck1 : -----GSNVVGVIHYRVGKKIGEGSFGVIFEGTNLLNSQTVAIKFEPKRSAPQLRDEYRTYKILVGCPIPNVYVFGQ : 83
CaCK1 : -----MNFGTSHSSSKNSHNNVVLGHYKIGKKIGEGSFGVIFEGTNLLNQAQAIAKFEPKRSAPQLRDEYRTYKILVGCPIPNVYVFGQ : 88
Yck1 : ---MSMPIASTT---LAVNN---LTNINGNANFNVAQNKQLHHQAVDSPARSSMTATTAAANSNNSSRDSTIVGLHYKIGKKIGEGSFGVIFEGTNMINGVPAIKFEPKRSAPQLRDEYRTYKILVGCPIPNVYVFGQ : 133
Yck2 : MSQVQSPLTATNSGLAVNNNTMNSQMPNRSNVRLVNGTLPSSLHVSSNLNHTGNSSASYGSQSRDSTIVGLHYKIGKKIGEGSFGVIFEGTNMINGVPAIKFEPKRSAPQLRDEYRTYKILVGCPIPNVYVFGQ : 140

```

kinase domain

```

      *      160      *      180      *      200      *      220      *      240      *      260      *      280
FgYck1 : EGLHNLVIDLLGPSLEDLFDICGRRFSLKTVVMIAKQMLSRVQTHIEKNLIYRDIKPDNFLIGRPGTKASSVTHVVDFGMAKQYRDPKTKQHIPPYREKRLSGTARYMSINTHLGREQSRDDLEALGHVFIYFLRGGL : 217
FoYck1 : EGLHNLVIDLLGPSLEDLFDICGRRFSLKTVVMIAKQMLSRVQTHIEKNLIYRDIKPDNFLIGRPGTKASSVTHVVDFGMAKQYRDPKTKQHIPPYREKRLSGTARYMSINTHLGREQSRDDLEALGHVFIYFLRGGL : 217
MoYck1 : EGLHNLVIDLLGPSLEDLFDICGRRFSLKTVVMIAKQMLSRVQTHIEKNLIYRDIKPDNFLIGRPGTKASSVTHVVDFGMAKQYRDPKSKQHIPPYREKRLSGTARYMSINTHLGREQSRDDLEALGHVFIYFLRGGL : 217
NeYck1 : EGLHNLVIDLLGPSLEDLFDICGRRFSLKTVVMIAKQMLSRVQTHIEKNLIYRDIKPDNFLIGRPGTKASSVTHVVDFGMAKQYRDPKTKQHIPPYREKRLSGTARYMSINTHLGREQSRDDLEALGHVFIYFLRGGL : 218
BeYck1 : EGLHNLVIDLLGPSLEDLFDICGRRFSLKTVVMIAKQMLSRVQTHIEKNLIYRDIKPDNFLIGRPGTKASSVTHVVDFGMAKQYRDPKTKQHIPPYREKRLSGTARYMSINTHLGREQSRDDLEALGHVFIYFLRGGL : 217
AnYck1 : EGLHNLVIDLLGPSLEDLFDICGRRFSLKTVVMIAKQMLSRVQTHIEKNLIYRDIKPDNFLIGRPGTKASSVTHVVDFGMAKQYRDPKTKQHIPPYREKRLSGTARYMSINTHLGREQSRDDLEALGHVFIYFLRGGL : 217
UmYck1 : EGLHNLVIDLLGPSLEDLFDICGRRFSLKTVVMIAKQMLSRVQTHIEKNLIYRDIKPDNFLIGRPGTKASSVTHVVDFGMAKQYRDPKTKQHIPPYREKRLSGTARYMSINTHLGREQSRDDLEALGHVFIYFLRGGL : 223
CaCK1 : EGVHNLVIDLLGPSLEDLFDICGRRFSLKTVVMIAKQMLSRVQTHIEKNLIYRDIKPDNFLIGRPGTKASSVTHVVDFGMAKQYRDPKTKQHIPPYREKRLSGTARYMSINTHLGREQSRDDLEALGHVFIYFLRGGL : 228
Yck1 : EGLHNLVIDLLGPSLEDLFDICGRRFSLKTVVMIAKQMLSRVQTHIEKNLIYRDIKPDNFLIGRPGTKASSVTHVVDFGMAKQYRDPKTKQHIPPYREKRLSGTARYMSINTHLGREQSRDDLEALGHVFIYFLRGGL : 273
Yck2 : EGLHNLVIDLLGPSLEDLFDICGRRFSLKTVVMIAKQMLSRVQTHIEKNLIYRDIKPDNFLIGRPGTKASSVTHVVDFGMAKQYRDPKTKQHIPPYREKRLSGTARYMSINTHLGREQSRDDLEALGHVFIYFLRGGL : 280

```

kinase domain

```

      *      300      *      320      *      340      *      360      *      380      *      400      *      420
FgYck1 : PWQGLKAAINLKQYKEIGKKQTITAIKDLCEGPPBEFSKYLIVYRNLFEDTDPDYDLRLFTQALKNTGEVDEGEYDWMKISK-----DSGKGWDSKNHSNAYLHNPVVRPGPSQMEHLHSGHRPGNT----- : 340
FoYck1 : PWQGLKAAINLKQYKEIGKKQTITAIKDLCEGPPBEFSKYLIVYRNLFEDTDPDYDLRLFTQALKNTGEVDEGEYDWMKISK-----DSGKGWDSKSHSGAYLHNPVVRPGPSQMEHLHSGHRPGNT----- : 340
MoYck1 : PWQGLKAAINLKQYKEIGKKQTITAIKDLCEGPPBEFSKYLIVYRNLFEDTDPDYDLRLFTQALKESGVEDEGEYDWMKISK-----DKNDWDR-----QAMHNPSPRGASNMELHGASRGAAH----- : 335
NeYck1 : PWQGLKAAINLKQYKEIGKKQTITAIKDLCEGPPBEFSKYLIVYRNLFEDTDPDYDLRLFTQALKESGVEDEGEYDWMKISK-----DKNDWDR-----GALHNPSPRGASNMELHSGHRPGNT----- : 337
BeYck1 : PWQGLKAAINLKQYKEIGKKQTITAIKDLCEGPPBEFSKYLIVYRNLFEDTDPDYDLRLFTQALKESGVEDEGEYDWMKISK-----GKGWEAMKQHPQSHLHNPVVRPGPSQMEHLHSGHRPGNT----- : 340
AnYck1 : PWQGLKAAINLKQYKEIGKKQTITAIKDLCEGPPBEFSKYLIVYRNLFEDTDPDYDLRLFTQALKESGVEDEGEYDWMKISK-----GKGWE-YKSYSSQALQN---SAMHTSARDLHGQQIRNSQ----- : 337
UmYck1 : PWQGLKAAINLKQYKEIGKKQTITAIKDLCEGPPBEFSKYLIVYRNLFEDTDPDYDLRLFTQALKESGVEDEGEYDWMKISK-----GKGWE-YKSYSSQALQN---SAMHTSARDLHGQQIRNSQ----- : 357
CaCK1 : PWQGLKAAINLKQYKEIGKKQTITAIKDLCEGPPBEFSKYLIVYRNLFEDTDPDYDLRLFTQALKESGVEDEGEYDWMKISK-----GKGWDAALN-----GKGWDAALN----- : 321
Yck1 : PWQGLKAPNNKQYKEIGKKQTITAIKDLCEGPPBEFSKYLIVYRNLFEDTDPDYDLRLFTQALKESGVEDEGEYDWMKISK-----GKGWDLNINKKPNLHGYPNPPEKSKRHRNKQLQMQLQMQQLQ : 403
Yck2 : PWQGLKAPNNKQYKEIGKKQTITAIKDLCEGPPBEFSKYLIVYRNLFEDTDPDYDLRLFTQALKESGVEDEGEYDWMKISK-----GKGWDLNINKKPNLHGYPNPPEKSKRHRNKQHYSSPDHMHY : 410

```

kinase domain

```

      *      440      *      460      *      480      *      500      *      520      *      540      *      560
FgYck1 : -----TSHQQAQN---LTVGRLNAAAPPPPSPIKQMG---KQRDRPSAPGALSAQRGSGVGGRL-DMAIPGSGTQAQFNSAQNLPQQRTPSQGQATQPTQASGQAN---PQPSGFGKLMKT---CCG--- : 453
FoYck1 : -----TSHQQAQN---LTVGRLNAAAPPPPSPIKQMG---KQRDRPSAPGALSAQRGSGVGGRL-DMAIPGSGTQAQFNSAQNLPQQRTPSQGQATQPAQASGQAN---PQPSGFGKLMKT---CCG--- : 453
MoYck1 : -----SDLRDPARLTVDRLNAAAPPPPSPIKAN---QKQDRRNAPGALMASRG---AGGLR-DMAIPGSGTQAQFNSAQNLPQQRTPSQGQATQPAQASGQAN---PQPSGFGKLMKT---CCG--- : 446
NeYck1 : -----HHASDPRAQLTAARLNAPQPSPP---PAQPGQ---RAKEQPNANAGNNRAYKS-----QPPTGSGAGNAPYNNMQPPQRTMTHTATNTNPPPSNPQQ---QQGGIKGITWKA---CCS--- : 441
BeYck1 : -----TPGH---LTAARLNAAAPPPPSPIKPMGKSRDRQNAFGALAPKRN---GAAGAQTQASGTPAGSGTQAQFNSAQNLPQQRTPSQGQATQPAQASGQAN---PQPSGFGKLMKT---CCG--- : 449
AnYck1 : -----RPG---VTADRLNAAAPPPPSPAKPGAGKTREPQNVRCGIPPKRQSGGF---DTTPAASVTAQFNSAQNLPQQRTPSQGQATQPAQASGQAN---PQPSGFGKLMKT---CCG--- : 444
UmYck1 : -----GRKSGGAQQLQSDRSQAGLRAASHGDTYQSGSGYGGVGHASNAVHDAIVVGIPN---QNGIREHSHVGHMTPATMS---SGNGLDRRGDTRQAVGINSNGDHHPAERKTVGQKLMKV---TCRCG : 476
CaCK1 : -----KKANLHGYGNPYPHPSQGG---RRAATTAAGTGT---DTIIGKISTITFTPSTITWEFSFKR----- : 377
Yck1 : QQQQQQQYQA---KTEADMRNSQYKPLDPTSYEAYQHITQKKYLQEQQKRRQKKQLQEQLQEQLQQQQQQQQLRALGQPPSQPAATQSQQFGARYQPQQPSAALRTPQHNDNSSLAASHKGFQKLGCC--- : 538
Yck2 : NQQQQQQQAQAQAQAQAQAKVQQQQQLQQAQAQAQAQANRYQLQPDSSHIDEERE---ASKLDPTSYEAYQQQLQKQYTAQQQKQMQKSKQFANTGANGQTNKYPYNAQPTANDEQNAKNAAGDRNSNKS---KGFFSKLGCC--- : 546

```

di-cysteine
