# Supplementary figures and images for: Stage-Specific Genetic Interaction between FgYCK1 and FgBNI4 during Vegetative Growth and Conidiation in Fusarium graminearum
Source: MDPI journal article supplement (doi:10.3390/ijms23169106), 2022-08-14

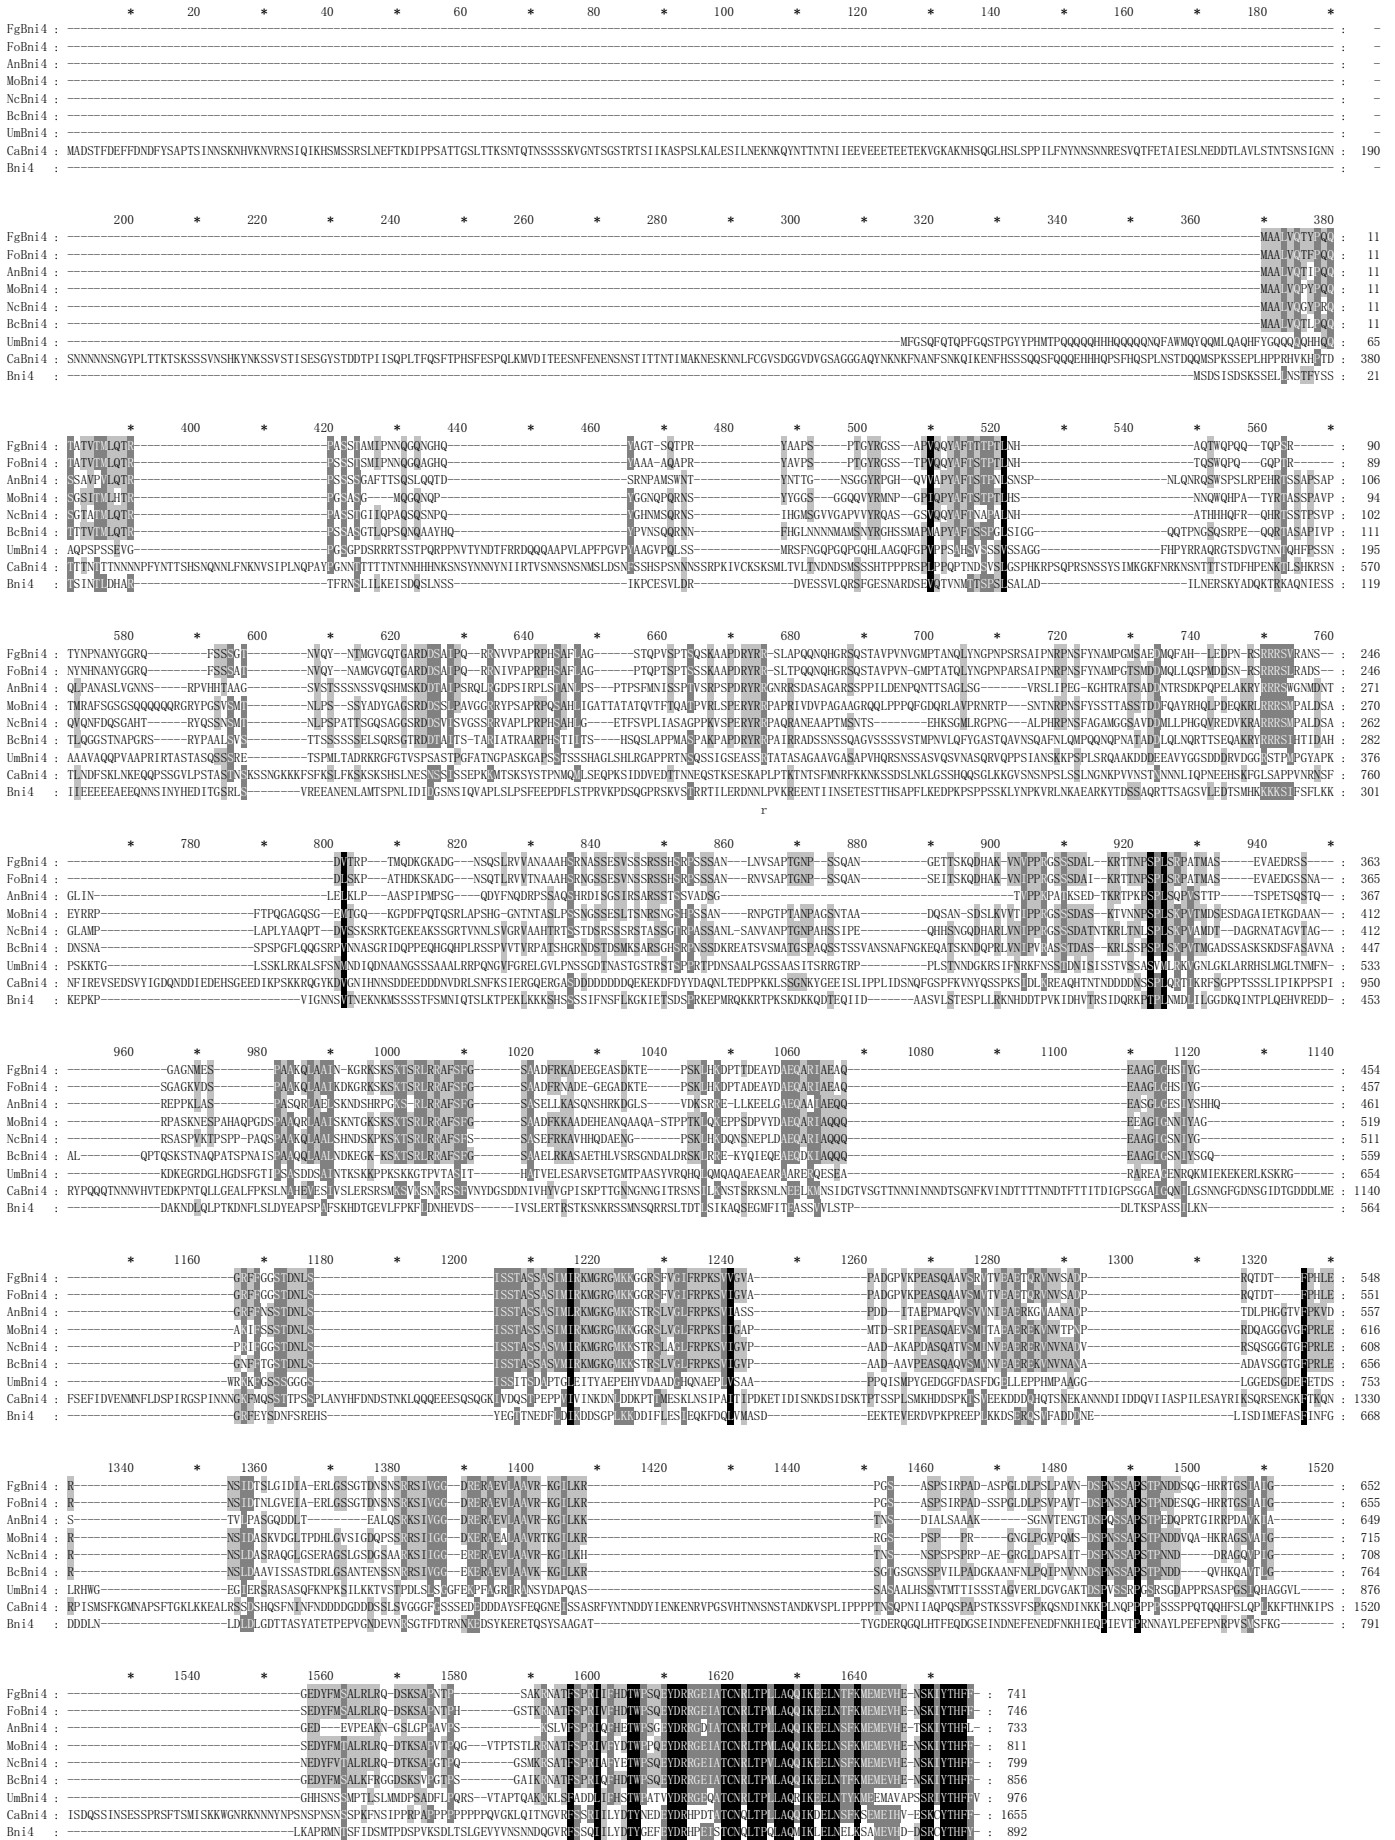

Supplement: s1 [file s1]
